# Supplementary material for: Clinical, aetiological, and epidemiological studies of outpatient cases of hand, foot, and mouth disease in Chengdu, China, from 2019 to 2022: a retrospective study
Source: PubMed Central journal article supplement — BMC Public Health. 2024 Dec 18;24:3427. doi: 10.1186/s12889-024-20909-8 (PMC11654434; doi:10.1186/s12889-024-20909-8), 2024-12-18
Supplement: 12889_2024_20909_MOESM1_ESM.pdf [file 12889_2024_20909_MOESM1_ESM.pdf]

## SUPPLEMENTAL MATERIALS

### **Additional file 1:**

**Table S1.** Pathogen distribution of HFMD outpatients in Chengdu, China, 2019-2022.

**Fig S1.** Clinical images of typical HFMD patients.

Rashes and ulcerations on the a) hand and b-c) foot of typical HFMD patients.

**Fig S2.** Age distribution of 45 inpatients progressing from outpatients with HFMD.

**Fig S3.** Distribution of serotypes among outpatients with different outcomes.

**Fig S4.** ROC Curve for Predicting Hospitalization in HFMD Patients.

**Table S1.** Pathogen distribution of HFMD outpatients from May 2019 to December 2022.

| Year       | 2019      | 2020       | 2021       | 2022       |
|------------|-----------|------------|------------|------------|
| Total      | 204       | 269        | 403        | 197        |
| Male (%)   | 115       | 169        | 228        | 124        |
| Age(month) | 22(16~36) | 22(15~34)  | 22(15~25)  | 24(15~36)  |
| CVA6 (%)   | 93(45.59) | 256(95.17) | 313(77.67) | 159(80.71) |
| CVA10 (%)  | 31(15.20) | 12(4.45)   | 60(14.89)  | 4(2.03)    |
| CVA16 (%)  | 80(39.21) | 1(0.38)    | 30(7.44)   | 34(17.26)  |

CV, Coxsackievirus.

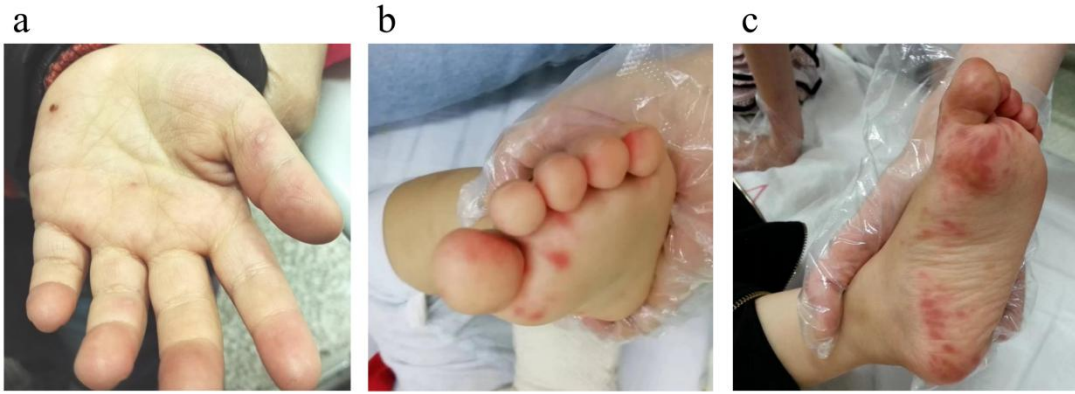

**Fig S1.** Clinical images of typical HFMD patients.

Rashes and ulcerations on the a) hand and b-c) foot of typical HFMD patients.

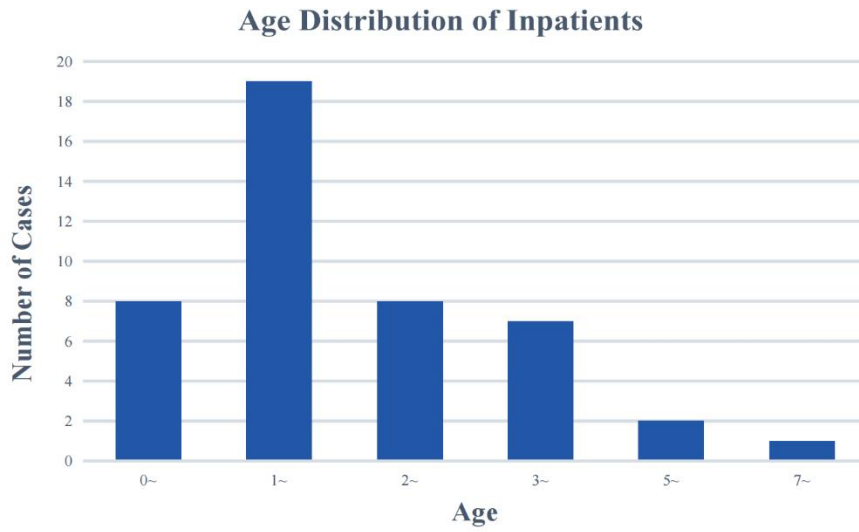

**Fig S2.** Age distribution of 45 inpatients progressing from outpatients with HFMD.

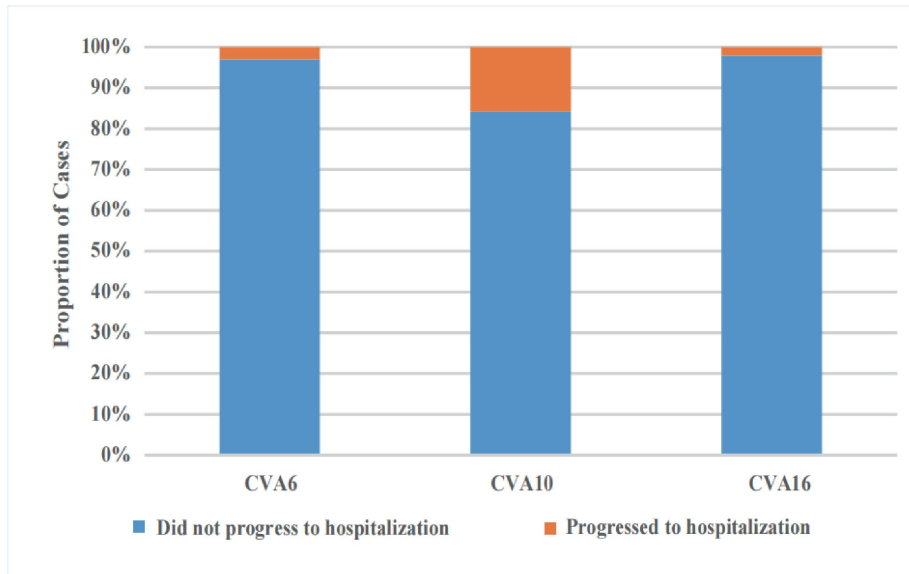

**Fig S3.** Distribution of serotypes among outpatients with different outcomes.

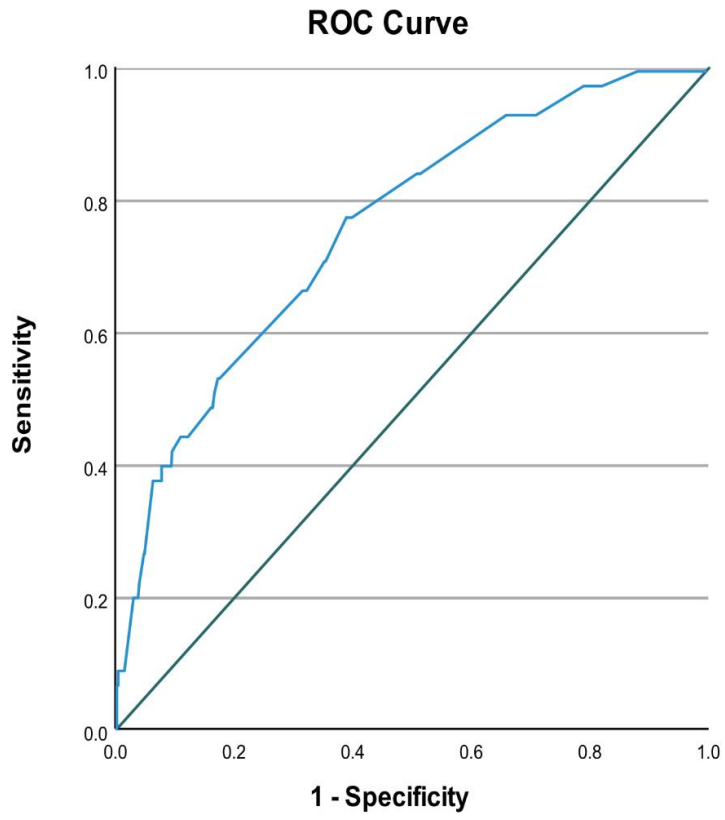

**Fig S4.** ROC Curve for Predicting Hospitalization in HFMD Patients.
